# Supplementary material for: Feeding Behavior of Finishing Pigs under Diurnal Cyclic Variation in Ambient Temperature
Source: Preprints.org preprint supplement (doi:10.20944/preprints202301.0418.v1), 2023-01-24
Supplement: Supplementary file 3 [file supplementary]

Feeding behavior of finishing pigs under diurnal cyclic variation in ambient temperature

Marllon José Karpeggiane de Oliveira 1, Marcio Valk 2, Antônio Diego Brandão Melo 1, Danilo Alves Marçal 1, Cleslei Alisson Silva 1, Graziela Alves da Cunha Valini 1, Pedro Righetti Arnaut 1, Joseane Penteado Rosa Gonçalves 1, Ines Andretta 4, Luciano Hauschild 1,*


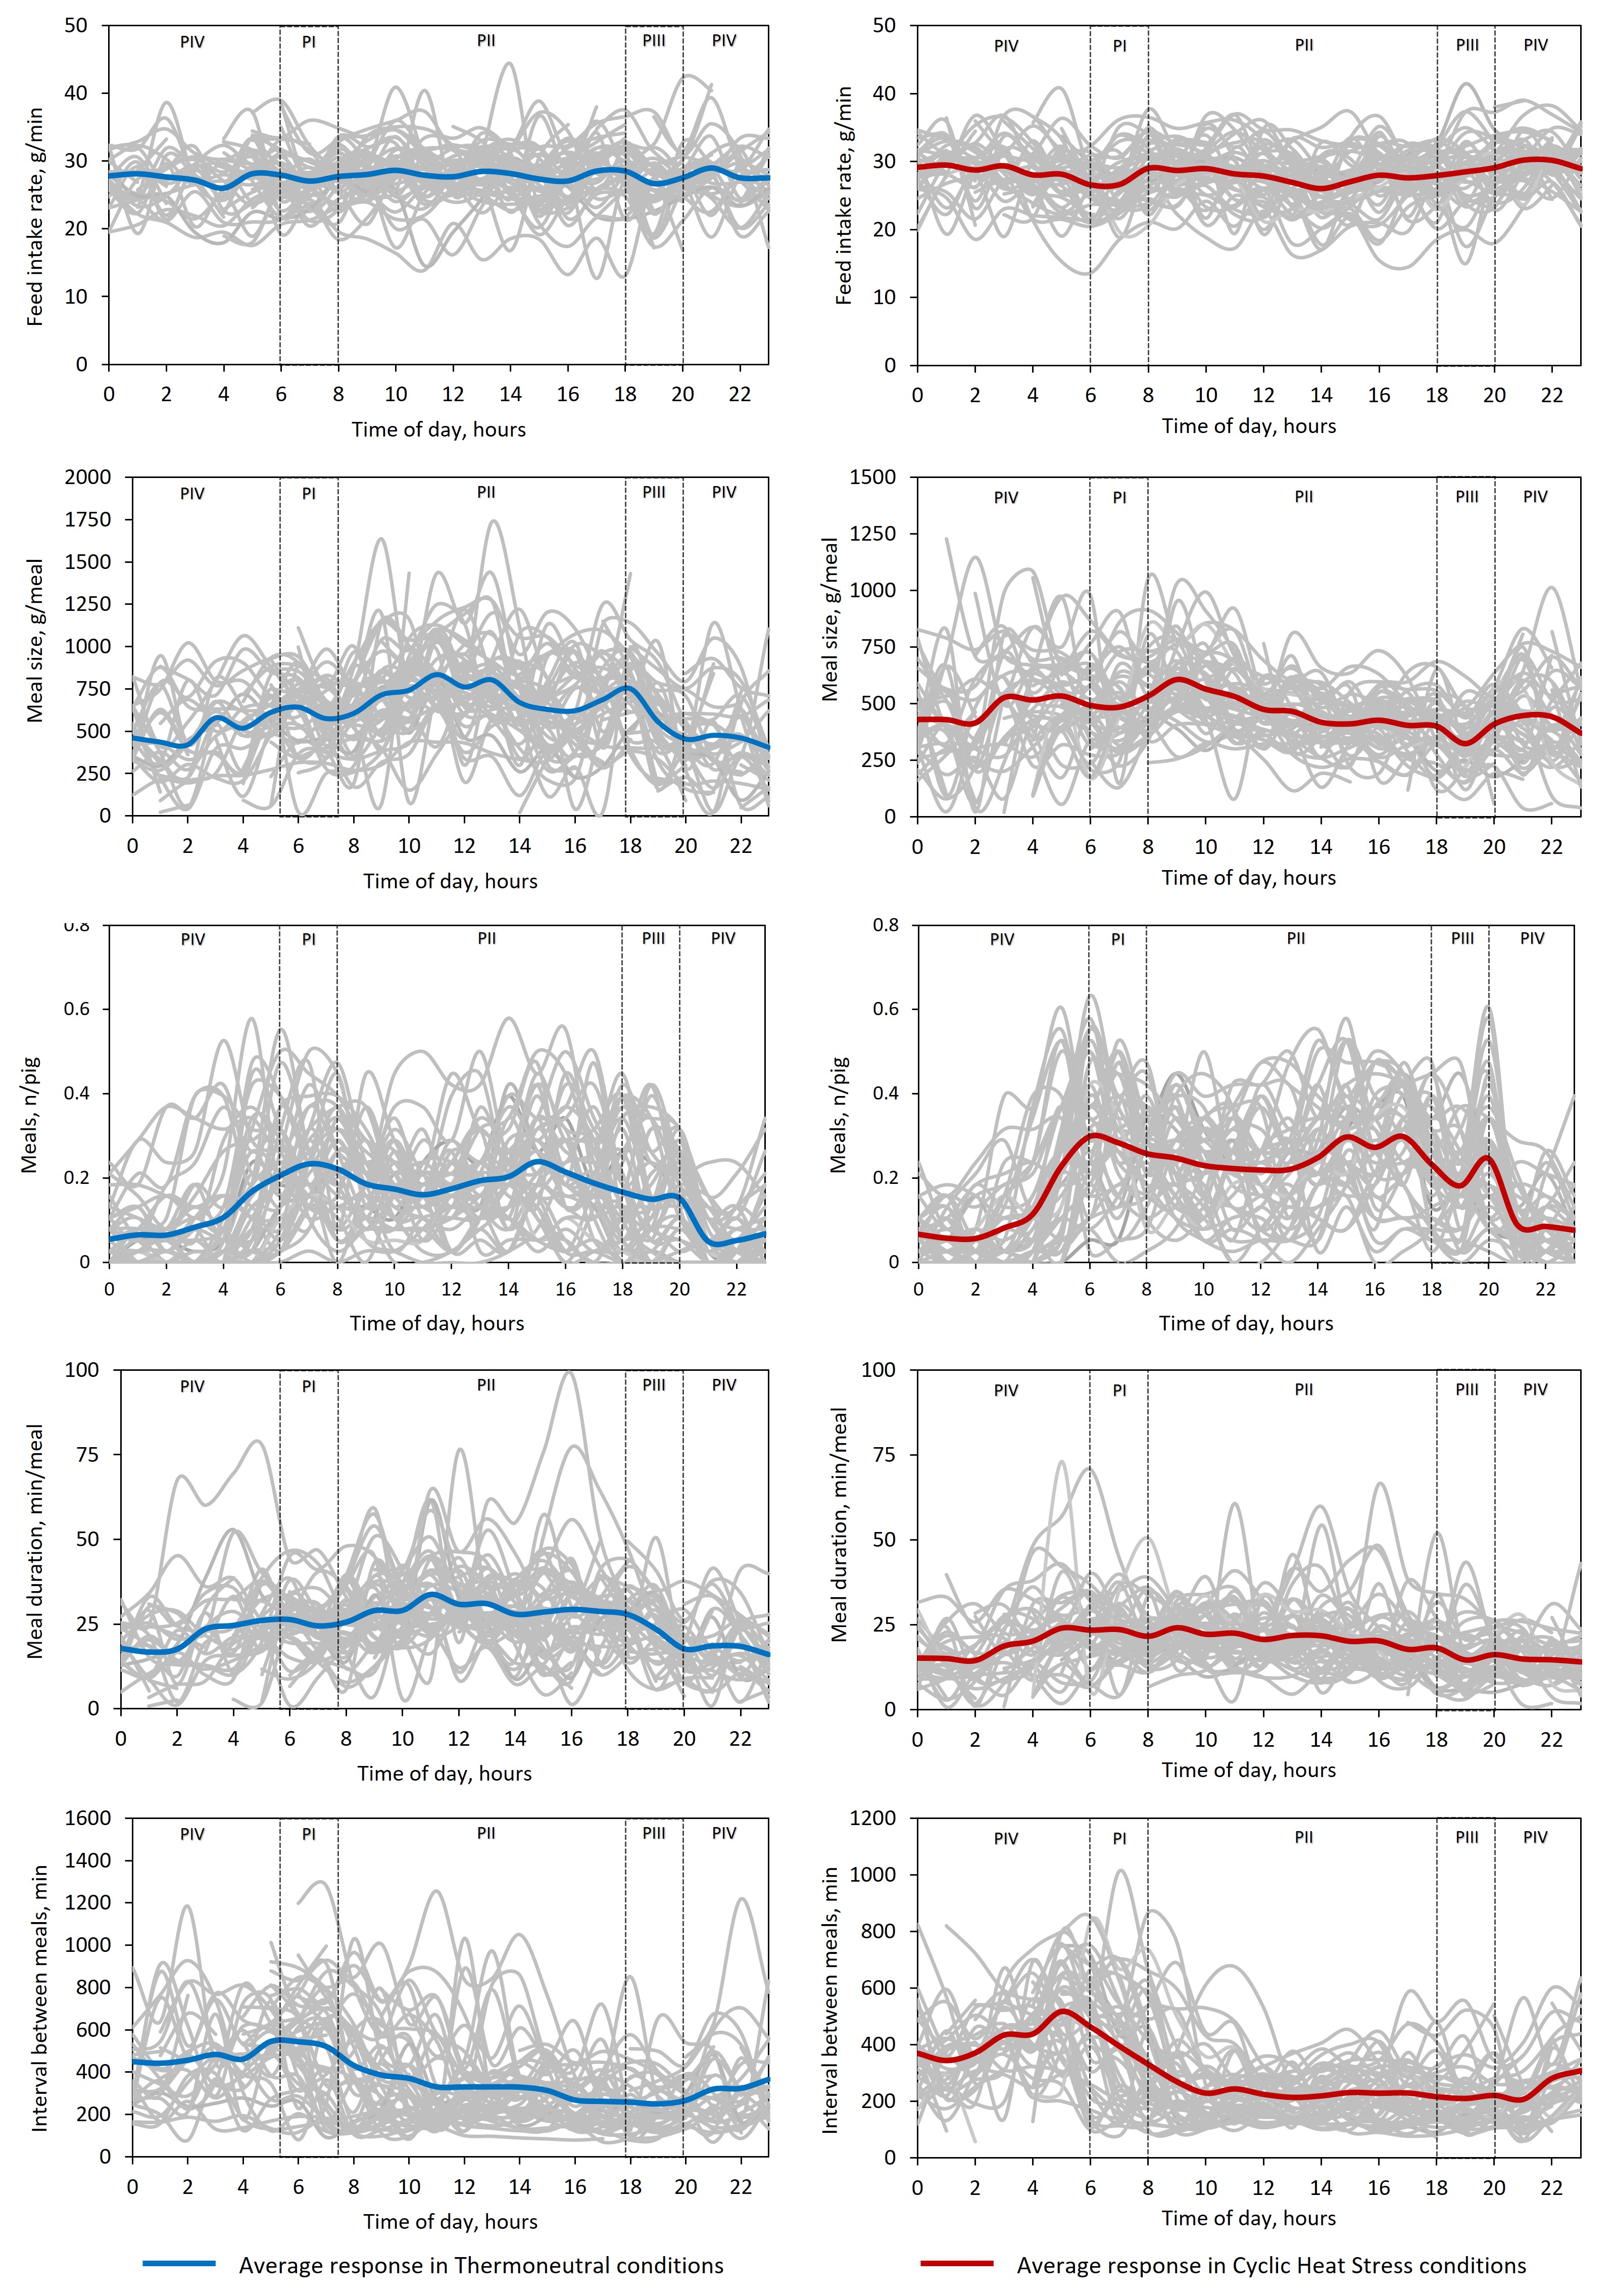


**Supplementary Figure S1**. Individual pig behavior profiles of pigs during the experimental period throughout 24 h-day according to ambient temperature (Thermoneutral vs. Cyclic heat stress) and periods of the day: PI (06-08 h); PII (08-18 h); PIII (18-20 h); PIV (20-06 h). The thermoneutrality condition was 24 h at 22°C, while the cyclic heat stress condition was 12 h at 22 °C, 20-08 h, and 12 h at 35 °C, 8-20 h.
